# Supplementary material for: Reanalysis of RNA-Sequencing Data Reveals Several Additional Fusion Genes with Multiple Isoforms
Source: PLoS One. 2012 Oct 31;7(10):e48745. doi: 10.1371/journal.pone.0048745 (PMC3485361; doi:10.1371/journal.pone.0048745)
Supplement: Table S3 — Several fusion transcripts code for functional protein domains. Type of fusion transcript (promoter-coding, coding-coding, coding-3′UTR) is indicated along with the sequences of the 3′ and 5′ fusion genes taking part in the fusion transcripts. Domain predictions of the fusion transcripts are implied as predicted by SMART [38], [39]. * denotes threshold predictions. (XLSX) [file pone.0048745.s007.xlsx]

## Sheet: Sheet1
Fusion	Type of fusion	parts of 5' gene in fusion	domains of 5' partner	parts of 3' gene in fusion	domains of 3' partner
THRA-AC090627.1	coding-3'UTR	exons 1-7	ZNF-C4, coiled coil, HOLI	exon 2-3'UTR	untranslated
	coding-3'UTR	exons 1-7	ZNF-C4, coiled coil, HOLI	exons 1-2-3'UTR	untranslated
	coding-intron-coding -3'UTR	exons 1-7	ZNF-C4, coiled coil, HOLI	exons 1-intronic region-exon 2-3'UTR	untranslated
TOB1-SYNRG	promoter-coding	5' UTR - exon 1 partly	untranslated	exons 20-22	low complexity
	promoter-coding	5' UTR - exon 1	untranslated	exons 20-22	low complexity
AHCTF1-NAAA	promoter-coding	5' UTR - exon 1	untranslated	exons 5-11	LamGL, Kelch, LRR_CC*
MED1-STXBP4	promoter-coding	5' UTR - exon 1	low complexity	exons 17-18	WW
	promoter-intron	5' UTR - exon 1	untranslated	intronic region	untranslated
MED13-BCAS3	coding-3'UTR	exons 1-5	low complexity	exon 3-3' UTR	END*
	coding-3'UTR	exons 1-5	low complexity	exons 2-3-3'UTR	END, HMG*
	-	subcloning N/A	-	-	-
MED1-ACSF2	coding-coding	exons 1-6	low complexity	exons 11-16	low complexity
TRPC4AP-MRPL45	promoter-coding	5'UTR-exons 1-2	low complexity	exons 7-8	low complexity
	promoter-coding	5'UTR-exons 1-2	TIM44	exons 6-8	TIM44
	promoter-coding	5'UTR-exons 1-2	TIM44	exons 5-8	TIM44
	-	subcloning N/A	-	-	-
STX16-RAE1	promoter-coding	5'UTR-exons 1-2	low complexity	exons 2-12	4 x WD40
	intron-coding	5'UTR-exon1-intronic region	untranslated	exons 2-12	4 x WD40
USP32-MED1	promoter-coding	5'UTR-exons 1-2	low complexity	exons 2-17	low complexity
	-	RERE	-	-	-
PIP4K2B-RAD51C	coding-coding	exons 1-7	low complexity	exons 8-9	PIPKc
	-	RELB	-	-	-
GCN1L1-MSI1	promoter-coding	5'UTR-exons 1-2	low complexity	exons 12-15	low complexity
	promoter-coding	5'UTR-exons 1-2	low complexity	exons 11-15	low complexity
AC099850.1-TMEM49	promoter-coding	5' UTR - exon 1 partly	untranslated	exons 11-12	transmembrane
	promoter-coding	5' UTR - exon 1	untranslated	exons 11-12	transmembrane
	promoter-intron-coding	5' UTR - exon 1	untranslated	intronic region, exons 11-12	transmembrane
	promoter-coding	5' UTR - exon 1	untranslated	SKA2, exons 11-12	transmembrane
SMARCA4-CARM1	coding-coding	exons 1-4	QLQ	exons 2-16	low complexity
